# Supplementary material
Source: PubMed Central journal article supplement (PMC8425695)
Supplement: mmc1.pdf [file mmc1.pdf]

**Figure S1. Individual anti-spike Ig titer according to dialysis modality.**

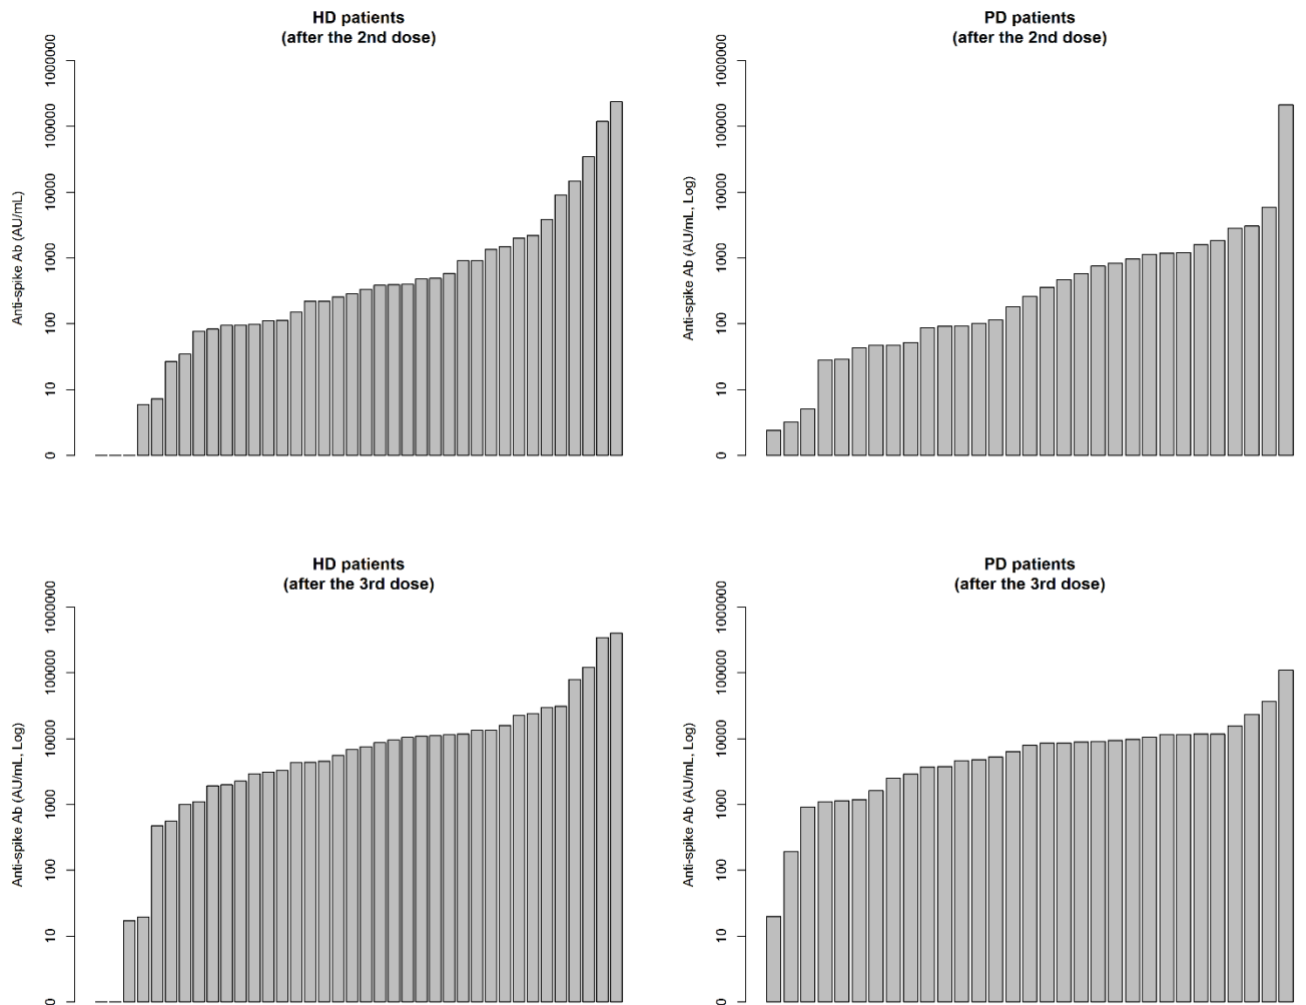

**Item S1 : Questionnaire on vaccine reaction after the third vaccine dose.**

**1. After the third vaccine injection, did you feel any of these side effects?**

- Pain at injection site
- Swelling at injection site
- Redness at injection site
- Headaches
- Diarrhea
- Fatigue
- Fever
- Chills
- Muscle pain

**2. In comparison with the second injection, would you say that adverse events with the third injection were:**

- Similar
- Worse
- Better

**3. After the third injection, have you been hospitalized or did you visit Emergency Department for any reason?**

**Table S1. Non- and weak-responders after the second vaccine dose.**

| Age (years) | Sex | BMI (kg/m <sup>2</sup> ) | Dialysis modality | Dialysis vintage (years) | Indication of IS treatment | Immunosuppressive treatment | Interval since last IS treatment (months) | Anti-spike after the 2 <sup>nd</sup> vaccine dose (AU/ml) | Anti-spike after the 3 <sup>rd</sup> vaccine dose (AU/ml) |
|-------------|-----|--------------------------|-------------------|--------------------------|----------------------------|-----------------------------|-------------------------------------------|-----------------------------------------------------------|-----------------------------------------------------------|
| 75          | F   | 19.5                     | HD                | 0.1                      | AL amyloidosis             | CYP-Velcade-Dexa            | Ongoing                                   | 0                                                         | 0                                                         |
| 79          | F   | 18.8                     | HD                | 7                        | Myeloma                    | CYP-Pomalidomide            | Ongoing                                   | 0                                                         | 0                                                         |
| 83          | F   | 16.0                     | HD                | 20                       | Arthrosis                  | Corticosteroids             | Ongoing                                   | 0                                                         | 19.3                                                      |
| 66          | F   | 20                       | PD                | 4                        | Psoriatic arthritis        | Methotrexate                | Ongoing                                   | 2.4                                                       | 5306                                                      |
| 76          | M   | 25.9                     | PD                | 3                        | MPGN                       | Corticosteroids             | 9                                         | 3.2                                                       | 1105                                                      |
| 90          | M   | 28.2                     | PD                | 3                        | 0                          | 0                           | -                                         | 5.1                                                       | 191                                                       |
| 79          | F   | 31.3                     | HD                | 0.2                      | Membranous nephropathy     | Rituximab                   | 7                                         | 5.9                                                       | 1006                                                      |
| 71          | M   | 23.7                     | HD                | 2                        | Myeloma                    | Revlimid                    | Ongoing                                   | 7.2                                                       | 17                                                        |
| 75          | M   | 23.4                     | HD                | 7                        | ANCA vasculitis            | Corticosteroids<br>Imurel   | Ongoing                                   | 26.6                                                      | 13411                                                     |
| 83          | M   | 28.9                     | PD                | 2                        | 0                          | 0                           | -                                         | 28                                                        | 1625                                                      |
| 84          | M   | 23.1                     | PD                | 6                        | 0                          | 0                           | -                                         | 29                                                        | 11736                                                     |
| 63          | M   | 34.9                     | HD                | 1                        | 0                          | 0                           | -                                         | 34.7                                                      | 4325                                                      |
| 71          | F   | 27.4                     | PD                | 1                        | 0                          | 0                           | -                                         | 47                                                        | 15565                                                     |
| 60          | F   | 34.4                     | PD                | 1                        | 0                          | 0                           | -                                         | 47                                                        | 1188                                                      |
| 64          | F   | 34.4                     | PD                | 0.5                      | 0                          | 0                           | -                                         | 42.9                                                      | 11736                                                     |

Patients with a titer of anti-spike Ig below 0.8 AU/mL were considered as non-responders. Patients with a serology titer between 0.8 AU/mL and 50 AU/mL, were considered as weak-responders. CYP: cyclophosphamide; HD: hemodialysis ; IS: immunosuppressive; MPGN: Membranoproliferative glomerulonephritis; PD: peritoneal dialysis.

**Table S2. Patients without increase in antibody titer after the third vaccine dose.**

| Age (years) | Sex | Dialysis modality | Dialysis vintage (years) | BMI (kg/m <sup>2</sup> ) | Comorbidity              | Immunosuppressive treatment | Interval between the 2 <sup>nd</sup> and the 3 <sup>rd</sup> vaccine dose | Anti-spike Ab after the 2 <sup>nd</sup> vaccine dose (AU/ml) | Anti-spike Ab after the 3 <sup>rd</sup> vaccine dose (AU/ml) | Anti-nucleocapsid Ab |
|-------------|-----|-------------------|--------------------------|--------------------------|--------------------------|-----------------------------|---------------------------------------------------------------------------|--------------------------------------------------------------|--------------------------------------------------------------|----------------------|
| 75          | F   | HD                | 0.1                      | 19.5                     | AL Amyloidosis           | CYP-Velcade-Dexa            | 3                                                                         | 0                                                            | 0                                                            | 0.1                  |
| 79          | F   | HD                | 7                        | 18.7                     | Myeloma                  | CYP-Pomalidomide            | 9.7                                                                       | 0                                                            | 0                                                            | 0.1                  |
| 79          | F   | HD                | 21                       | 17.6                     | Atherosclerosis disease  | No                          | 5                                                                         | 906                                                          | 558                                                          | 0.1                  |
| 65          | M   | PD                | 3                        | 33.7                     | Alport syndrom           | No                          | 8                                                                         | 87                                                           | 19.7                                                         | 0.09                 |
| 51          | M   | HD                | 0.2                      | 36.3                     | Hypertension             | No                          | 9.4                                                                       | 34433                                                        | 31256                                                        | NA                   |
| 56          | F   | PD                | 3                        | 33.0                     | Hypertension<br>Diabetes | No                          | 10.9                                                                      | 212030                                                       | 109700                                                       | 53                   |

CYP: cyclophosphamide ; HD: hemodialysis ; PD: peritoneal dialysis; BMI: Body Mass Index.

**Table S3. Characteristics of the study population, according to the antibody response after the third vaccine dose.**

|                                                                   | Anti-spike < 50<br>AU/mL<br>n = 5 | Anti-spike ≥ 50<br>AU/mL<br>n = 64 | p      |
|-------------------------------------------------------------------|-----------------------------------|------------------------------------|--------|
| <b>Clinical characteristics</b>                                   |                                   |                                    |        |
| Age, years                                                        | 75.0 [71.0, 79.0]                 | 66.0 [51.8, 76.0]                  | 0.2    |
| Men, n (%)                                                        | 2 (40.0)                          | 43 (67.2)                          | 0.3    |
| Body mass index, kg/m <sup>2</sup>                                | 19.5 [18.7, 23.7]                 | 27.3 [22.4, 30.7]                  | 0.1    |
| Diabetes, n (%)                                                   | 0 ( 0.0)                          | 22 (34.4)                          | 0.2    |
| History of immunosuppression*, n (%)                              | 4 (80.0)                          | 8 (12.5)                           | 0.003  |
| History of hemopathy, n (%)                                       | 3 (60.0)                          | 3 ( 4.7)                           | 0.004  |
| History of immunosuppressive therapy, n (%)                       | 4 (80.0)                          | 5 ( 7.8)                           | 0.001  |
| Dialysis modality, HD                                             | 4 (80.0)                          | 34 (53.1)                          | 0.4    |
| Dialysis vintage, years                                           | 3.0 [2.0, 7.0]                    | 3.0 [1.0, 6.0]                     | 0.9    |
| KT/V                                                              | 1.5 [1.1, 1.8]                    | 1.6 [1.2, 1.9]                     | 0.5    |
| <b>Biological parameters</b>                                      |                                   |                                    |        |
| Lymphocytes, Giga/L                                               | 1.0 [0.6, 1.1]                    | 1.3 [0.9, 1.6]                     | 0.1    |
| Neutrophilic polymorphonuclear, Giga/L                            | 2.3 [1.1, 5.3]                    | 3.9 [2.9, 4.9]                     | 0.3    |
| Gamma globulin, g/L                                               | 3.9 [3.3, 5.2]                    | 9.6 [8.0, 13.6]                    | 0.003  |
| Serum albumin, g/l                                                | 34.6 [33.0, 38.7]                 | 37.3 [34.5, 41.9]                  | 0.3    |
| Serum prealbumin, g/l                                             | 0.30 [0.25, 0.36]                 | 0.34 [0.30, 0.41]                  | 0.4    |
| C reactive protein, mg/l                                          | 3.2 [1.3, 3.5]                    | 2.2 [0.9, 3.7]                     | 0.8    |
| <b>Humoral response after the second dose</b>                     |                                   |                                    |        |
| After the second vaccine dose                                     |                                   |                                    |        |
| Interval between the 2 <sup>nd</sup> dose - serology, d           | 49.0 [28.0, 56.0]                 | 50 [35, 58]                        | 0.6    |
| Anti-spike after the 2 <sup>nd</sup> dose, AU/ml                  | 0.0 [0.0, 7.2]                    | 372 [94, 1246]                     | 0.001  |
| After the third vaccine dose                                      |                                   |                                    |        |
| Interval between the 2 <sup>nd</sup> and 3 <sup>rd</sup> dose, d  | 30 [28, 30]                       | 30 [27, 36]                        | 0.7    |
| Anti-spike after the 3 <sup>rd</sup> dose, AU/ml                  | 17 [0, 19]                        | 8614 [3054, 11752]                 | <0.001 |
| Ratio anti-spike after the 3 <sup>rd</sup> / 2 <sup>nd</sup> dose | 1.3 [0.8, 1.8]                    | 24.1 [4.8, 64.8]                   | 0.07   |

Results are shown as median [interquartile range] for the continuous variables, or as number of patients (percentage) for the qualitative variables. Mann Whitney test and Fisher's exact test were used to compare continuous and categorical variables according to the dialysis modality.

\* History of immunosuppression means history of hemopathy and/or history of immunosuppressive therapy. AU: arbitrary unit ; HD : hemodialysis.

**Table S4. Characteristics of the study population, according to the anti-nucleocapsid serology status**

|                                                                   | Anti-nucleocapsid serology |                          | p     |
|-------------------------------------------------------------------|----------------------------|--------------------------|-------|
|                                                                   | Negative (< 1)<br>n=55     | Positive (>1)<br>n=4     |       |
| <b>Clinical characteristics</b>                                   |                            |                          |       |
| Age, years                                                        | 69.0 [53.5, 76.0]          | 47.5 [42.8, 51.5]        | 0.04  |
| Men, n (%)                                                        | 37 (67.3)                  | 2 ( 50.0)                | 0.6   |
| Body mass index, kg/m <sup>2</sup>                                | 26.6 [22.2, 29.1]          | 25.9 [23.0, 28.9]        | 0.9   |
| Diabetes, n (%)                                                   | 18 (32.7)                  | 3 ( 75.0)                | 0.1   |
| History of hemopathy, n (%)                                       | 5 ( 9.1)                   | 0 ( 0.0)                 | 1.0   |
| History of immunosuppressive therapy, n(%)                        | 7 (12.7)                   | 0 ( 0.0)                 | 1.0   |
| Dialysis modality, HD                                             | 29 (52.7)                  | 3 ( 75.0)                | 0.6   |
| Dialysis vintage, years                                           | 3.0 [1.0, 6.0]             | 3.0 [3.0, 6.5]           | 0.5   |
| KT/V                                                              | 1.6 [1.3, 1.9]             | 1.5 [1.3, 1.9]           | 0.9   |
| <b>Biological parameters</b>                                      |                            |                          |       |
| Lymphocytes, Giga/L                                               | 1.2 [1.0, 1.5]             | 1.6 [1.2, 2.0]           | 0.3   |
| Neutrophilic polymorphonuclear, Giga/L                            | 4.1 [2.9, 5.0]             | 2.2 [1.9, 2.5]           | 0.01  |
| Gamma globulin, g/L                                               | 9.0 [7.2, 12.0]            | 15.1 [14.8, 16.4]        | 0.004 |
| Serum albumin, g/l                                                | 37.2 [34.2, 40.2]          | 37.5 [33.6, 40.3]        | 0.8   |
| Serum prealbumin, g/l                                             | 0.35 [0.30, 0.41]          | 0.34 [0.32, 0.40]        | 0.9   |
| C reactive protein, mg/l                                          | 2.3 [0.9, 3.6]             | 1.8 [1.2, 5.9]           | 0.9   |
| <b>Humoral response</b>                                           |                            |                          |       |
| After the second vaccine dose                                     |                            |                          |       |
| Anti-spike after the 2 <sup>nd</sup> dose, AU/ml                  | 221 [64.5, 1045.5]         | 165565 [93014.5, 218260] | 0.001 |
| After the third vaccine dose                                      |                            |                          |       |
| Interval between the 2 <sup>nd</sup> and 3 <sup>rd</sup> dose, d  | 72.0 [58.0, 77.0]          | 66.0 [56.0, 69.3]        | 0.4   |
| Anti-spike after the 3 <sup>rd</sup> dose, AU/ml                  | 5606 [1965.5, 10509]       | 116110 [89721.5, 177865] | 0.002 |
| Ratio anti-spike after the 3 <sup>rd</sup> / 2 <sup>nd</sup> dose | 24.4 [6.4, 59.0]           | 1.2 [0.9, 1.6]           | 0.005 |

Results are shown as median [interquartile range] for the continuous variables, or as number of patients (percentage) for the qualitative variables. Mann Whitney test and Fisher's exact test were used to compare continuous and categorical variables according to the dialysis modality.

\*: arbitrary unit ; HD : hemodialysis.

**Table S5. Hospitalizations or visits to Emergency department within the 30 days following the third vaccine dose.**

| Age | Sex | Dialysis modality | Interval between the 3 <sup>rd</sup> dose and event (days) | Hospitalization (Y/N) | Adverse event                                    | Outcome   |
|-----|-----|-------------------|------------------------------------------------------------|-----------------------|--------------------------------------------------|-----------|
| 77  | M   | HD                | 26                                                         | Y                     | Infectious osteitis                              | Favorable |
| 35  | F   | HD                | 3                                                          | N                     | Fatigue                                          | Favorable |
| 71  | M   | PD                | 15                                                         | N                     | Chest pain                                       | Favorable |
| 69  | F   | PD                | 13                                                         | Y                     | Pulmonary Embolism                               | Favorable |
| 76  | M   | PD                | 5                                                          | Y                     | Infectious peritonitis ( <i>S. epidermidis</i> ) | Favorable |
| 54  | M   | PD                | 7                                                          | Y                     | Infectious peritonitis ( <i>S. epidermidis</i> ) | Favorable |
| 33  | M   | PD                | 16                                                         | Y                     | Infectious peritonitis ( <i>S. mitis</i> )       | Favorable |
| 47  | M   | PD                | 18                                                         | Y                     | Aseptic peritonitis                              | Favorable |

HD: hemodialysis ; PD: peritoneal dialysis
